# Supplementary material
Source: PubMed Central journal article supplement (PMC3773969)
Supplement: NIHMS323932-supplement-1.pdf [file NIHMS323932-supplement-1.pdf]

**Suppl Table 1: All unadjusted *P* Values and according *Q* values of SNP Genotype Associations**

|    | <b>Gene</b> | <b>Rs No.</b> | <b>MAF</b> | <b>RISK<br/><i>P</i> Chisq</b> | <b>RISK<br/><i>Q</i> value</b> | <b>TT<br/><i>P</i> Wilcox</b> | <b>TT<br/><i>Q</i> value</b> | <b>TE<br/><i>P</i> Wilcox</b> | <b>TE<br/><i>Q</i> value</b> |
|----|-------------|---------------|------------|--------------------------------|--------------------------------|-------------------------------|------------------------------|-------------------------------|------------------------------|
| 1  | AKR1C1      | rs2904800     | 0.33       | 0.36750                        | 0.84080                        | 0.82051                       | 0.74496                      | 0.86844                       | 0.75530                      |
| 2  | AKR1C1      | rs11252845    | 0.06       | 0.00500                        | 0.24853                        | 0.12385                       | 0.71704                      | 0.32968                       | 0.72545                      |
| 3  | AKR1C1      | rs6650153     | 0.09       | 0.91679                        | 0.93447                        | 0.71063                       | 0.74496                      | 0.57128                       | 0.72545                      |
| 4  | AKR1C1      | rs7915338     | 0.55       | 0.49467                        | 0.86428                        | 0.16336                       | 0.73916                      | 0.74869                       | 0.72545                      |
| 5  | AKR1C2      | rs7909151     | 0.46       | 0.18091                        | 0.71694                        | 0.03796                       | 0.44718                      | 0.51111                       | 0.72545                      |
| 6  | AKR1C2      | rs11252867    | 0.20       | 0.08142                        | 0.49864                        | 0.23408                       | 0.74496                      | 0.62776                       | 0.72545                      |
| 7  | AKR1C2      | rs1937888     | 0.49       | 0.39214                        | 0.84080                        | 0.84386                       | 0.74496                      | 0.72930                       | 0.72545                      |
| 8  | AKR1C2      | rs10795227    | 0.32       | 0.90482                        | 0.93447                        | 0.53577                       | 0.74496                      | 0.97626                       | 0.77890                      |
| 9  | AKR1C2      | rs12249281    | 0.50       | 0.95529                        | 0.93447                        | 0.82894                       | 0.74496                      | 0.58895                       | 0.72545                      |
| 10 | AKR1C2      | rs2904812     | 0.23       | 0.21930                        | 0.75352                        | 0.36971                       | 0.74496                      | 0.37358                       | 0.72545                      |
| 11 | AKR1C2      | rs1937863     | 0.16       | 0.05160                        | 0.37909                        | 0.80822                       | 0.74496                      | 0.74909                       | 0.72545                      |
| 12 | AKR1C3      | rs10508293    | 0.14       | 0.28412                        | 0.83602                        | 0.27187                       | 0.74496                      | 0.43498                       | 0.72545                      |
| 13 | AKR1C3      | rs4881400     | 0.25       | 0.48081                        | 0.86428                        | 0.80070                       | 0.74496                      | 0.27249                       | 0.72545                      |
| 14 | AKR1C3      | rs11252920    | 0.31       | 0.45493                        | 0.86428                        | 0.54763                       | 0.74496                      | 0.85019                       | 0.75530                      |
| 15 | AKR1C3      | rs11252975    | 0.46       | 0.65337                        | 0.93447                        | 0.43709                       | 0.74496                      | 0.91608                       | 0.76042                      |
| 16 | AKR1C3      | rs7904863     | 0.23       | 0.94409                        | 0.93447                        | 0.81020                       | 0.74496                      | 0.81752                       | 0.74441                      |
| 17 | AKR1C4      | rs7085249     | 0.27       | 0.49849                        | 0.86428                        | 0.45685                       | 0.74496                      | 0.04493                       | 0.54156                      |
| 18 | AKR1C4      | rs1931679     | 0.10       | 0.20650                        | 0.75352                        | 0.08353                       | 0.57568                      | 0.10183                       | 0.66366                      |
| 19 | AKR1C4      | rs10904442    | 0.10       | 0.11483                        | 0.58678                        | 0.22744                       | 0.74496                      | 0.65666                       | 0.72545                      |
| 20 | AKR1C4      | rs17306485    | 0.15       | 0.07050                        | 0.45231                        | 0.73986                       | 0.74496                      | 0.76506                       | 0.72545                      |
| 21 | AKR1C4      | rs12247748    | 0.13       | 0.81703                        | 0.93447                        | 0.34153                       | 0.74496                      | 0.63402                       | 0.72545                      |
| 22 | AKR1C4      | rs11253045    | 0.29       | 0.11574                        | 0.58678                        | 0.19848                       | 0.74496                      | 0.25903                       | 0.72545                      |
| 23 | AKR1C4      | rs12253078    | 0.13       | 0.85189                        | 0.93447                        | 0.17471                       | 0.73916                      | 0.95448                       | 0.77890                      |
| 24 | AKR1C4      | rs10904445    | 0.08       | 0.22929                        | 0.75352                        | 0.30493                       | 0.74496                      | 0.26622                       | 0.72545                      |
| 25 | COMT        | rs1012157     | 0.30       | 0.87015                        | 0.93447                        | 0.81895                       | 0.74496                      | 0.46141                       | 0.72545                      |
| 26 | COMT        | rs5993875     | 0.43       | 0.48488                        | 0.86428                        | 0.94395                       | 0.75450                      | 0.50698                       | 0.72545                      |
| 27 | COMT        | rs5746847     | 0.43       | 0.54503                        | 0.88170                        | 0.98746                       | 0.75959                      | 0.58943                       | 0.72545                      |
| 28 | COMT        | rs6518591     | 0.17       | 0.26320                        | 0.82472                        | 0.78531                       | 0.74496                      | 0.14649                       | 0.67063                      |
| 29 | COMT        | rs174675      | 0.26       | 0.92643                        | 0.93447                        | 0.34712                       | 0.74496                      | 0.52132                       | 0.72545                      |
| 30 | COMT        | rs5993883     | 0.47       | 0.74822                        | 0.93447                        | 0.58601                       | 0.74496                      | 0.68381                       | 0.72545                      |
| 31 | CYP11A1     | rs2277603     | 0.08       | 0.91421                        | 0.93447                        | 0.44923                       | 0.74496                      | 0.45127                       | 0.72545                      |

|    | <b>Gene</b> | <b>Rs No.</b> | <b>MAF</b> | <b>RISK<br/>P Chisq</b> | <b>RISK<br/>Q value</b> | <b>TT<br/>P Wilcox</b> | <b>TT<br/>Q value</b> | <b>TE<br/>P Wilcox</b> | <b>TE<br/>Q value</b> |
|----|-------------|---------------|------------|-------------------------|-------------------------|------------------------|-----------------------|------------------------|-----------------------|
| 32 | CYP11A1     | rs2073475     | 0.22       | 0.02261                 | 0.32293                 | 0.22314                | 0.74496               | 0.66502                | 0.72545               |
| 33 | CYP11A1     | rs3803463     | 0.06       | 0.96216                 | 0.93447                 | 0.28693                | 0.74496               | 0.49017                | 0.72545               |
| 34 | CYP11A1     | rs4555110     | 0.21       | 0.02876                 | 0.32293                 | 0.41218                | 0.74496               | 0.69692                | 0.72545               |
| 35 | CYP17A1     | rs10883782    | 0.17       | 0.99858                 | 0.94087                 | 0.85031                | 0.74496               | 0.60199                | 0.72545               |
| 36 | CYP17A1     | rs17115100    | 0.07       | 0.36155                 | 0.84080                 | 0.95283                | 0.75450               | 0.49322                | 0.72545               |
| 37 | CYP17A1     | rs284851      | 0.12       | 0.81245                 | 0.93447                 | 0.05534                | 0.46825               | 0.42539                | 0.72545               |
| 38 | CYP17A1     | rs7089422     | 0.17       | 0.95835                 | 0.93447                 | 0.76580                | 0.74496               | 0.07402                | 0.63769               |
| 39 | CYP19A1     | rs1065778     | 0.41       | 0.69884                 | 0.93447                 | 0.08373                | 0.57568               | 0.20264                | 0.72545               |
| 40 | CYP19A1     | rs3784308     | 0.04       | 0.98485                 | 0.93447                 | 0.39998                | 0.74496               | 0.39604                | 0.72545               |
| 41 | CYP19A1     | rs10519297    | 0.43       | 0.76119                 | 0.93447                 | 0.33842                | 0.74496               | 0.13435                | 0.67063               |
| 42 | CYP19A1     | rs12907866    | 0.50       | 0.94701                 | 0.93447                 | 0.62959                | 0.74496               | 0.05516                | 0.54156               |
| 43 | CYP19A1     | rs17523880    | 0.15       | 0.44397                 | 0.86428                 | 0.66569                | 0.74496               | 0.05272                | 0.54156               |
| 44 | CYP19A1     | rs1870050     | 0.09       | 0.49634                 | 0.86428                 | 0.91384                | 0.75017               | 0.19397                | 0.72545               |
| 45 | CYP1A1      | rs12441817    | 0.07       | 0.43839                 | 0.86428                 | 0.31355                | 0.74496               | 0.89248                | 0.75726               |
| 46 | CYP1A1      | rs4646421     | 0.08       | 0.42603                 | 0.85675                 | 0.05316                | 0.46825               | 0.35082                | 0.72545               |
| 47 | CYP1A1      | rs2472299     | 0.21       | 0.32265                 | 0.83602                 | 0.89044                | 0.74496               | 0.57013                | 0.72545               |
| 48 | CYP1B1      | rs1800440     | 0.17       | 0.21706                 | 0.75352                 | 0.57320                | 0.74496               | 0.09850                | 0.66366               |
| 49 | CYP1B1      | rs2163454     | 0.42       | 0.61707                 | 0.93419                 | 0.00607                | 0.13362               | 0.45395                | 0.72545               |
| 50 | CYP1B1      | rs163078      | 0.37       | 0.85621                 | 0.93447                 | 0.97300                | 0.75450               | 0.35589                | 0.72545               |
| 51 | CYP1B1      | rs162556      | 0.46       | 0.41555                 | 0.84832                 | 0.85021                | 0.74496               | 0.53530                | 0.72545               |
| 52 | CYP1B1      | rs151096      | 0.49       | 0.97859                 | 0.93447                 | 0.75010                | 0.74496               | 0.49335                | 0.72545               |
| 53 | CYP3A4      | rs4646437     | 0.13       | 0.71666                 | 0.93447                 | 0.91188                | 0.75017               | 0.53630                | 0.72545               |
| 54 | CYP3A4      | rs2246709     | 0.35       | 0.16691                 | 0.70278                 | 0.44008                | 0.74496               | 0.73044                | 0.72545               |
| 55 | CYP3A4      | rs2242480     | 0.08       | 0.87670                 | 0.93447                 | 0.81509                | 0.74496               | 0.33209                | 0.72545               |
| 56 | CYP3A4      | rs2404955     | 0.11       | 0.54969                 | 0.88170                 | 0.67442                | 0.74496               | 0.98917                | 0.78019               |
| 57 | HSD17B12    | rs4755731     | 0.41       | 0.05077                 | 0.37909                 | 0.65429                | 0.74496               | 0.75485                | 0.72545               |
| 58 | HSD17B12    | rs11037556    | 0.33       | 0.64946                 | 0.93447                 | 0.84942                | 0.74496               | 0.71587                | 0.72545               |
| 59 | HSD17B12    | rs4620711     | 0.41       | 0.02675                 | 0.32293                 | 0.52967                | 0.74496               | 0.72585                | 0.72545               |
| 60 | HSD17B12    | rs7932905     | 0.49       | 0.00821                 | 0.24853                 | 0.74344                | 0.74496               | 0.74271                | 0.72545               |
| 61 | HSD17B12    | rs11037575    | 0.42       | 0.04509                 | 0.37909                 | 0.71032                | 0.74496               | 0.66658                | 0.72545               |
| 62 | HSD17B12    | rs6485451     | 0.49       | 0.00922                 | 0.24853                 | 0.89395                | 0.74496               | 0.77079                | 0.72545               |

|    | Gene     | Rs No.     | MAF  | RISK<br><i>P</i> Chisq | RISK<br><i>Q</i> value | TT<br><i>P</i> Wilcox | TT<br><i>Q</i> value | TE<br><i>P</i> Wilcox | TE<br><i>Q</i> value |
|----|----------|------------|------|------------------------|------------------------|-----------------------|----------------------|-----------------------|----------------------|
| 63 | HSD17B12 | rs6485453  | 0.45 | 0.01740                | 0.32293                | 0.89146               | 0.74496              | 0.78230               | 0.72786              |
| 64 | HSD17B12 | rs7934642  | 0.06 | 0.52636                | 0.87238                | 0.31423               | 0.74496              | 0.05802               | 0.54156              |
| 65 | HSD17B1  | rs2676530  | 0.26 | 0.29138                | 0.83602                | 0.25184               | 0.74496              | 0.68306               | 0.72545              |
| 66 | HSD17B1  | rs676387   | 0.34 | 0.11758                | 0.58678                | 0.61049               | 0.74496              | 0.50423               | 0.72545              |
| 67 | HSD17B1  | rs12602084 | 0.28 | 0.92727                | 0.93447                | 0.00586               | 0.13362              | 0.02366               | 0.54156              |
| 68 | HSD17B2  | rs9889094  | 0.05 | 0.30292                | 0.83602                | 0.02498               | 0.42449              | 0.01741               | 0.54156              |
| 69 | HSD17B2  | rs2966249  | 0.32 | 0.12257                | 0.58982                | 0.93915               | 0.75450              | 0.80838               | 0.74212              |
| 70 | HSD17B2  | rs1424151  | 0.06 | 0.29331                | 0.83602                | 0.00214               | 0.13362              | 0.05552               | 0.54156              |
| 71 | HSD17B2  | rs10514525 | 0.42 | 0.16041                | 0.69718                | 0.22901               | 0.74496              | 0.47141               | 0.72545              |
| 72 | HSD17B3  | rs12555788 | 0.04 | 0.57279                | 0.89988                | 0.03087               | 0.42449              | 0.05777               | 0.54156              |
| 73 | HSD17B3  | rs2025444  | 0.36 | 0.96897                | 0.93447                | 0.44164               | 0.74496              | 0.59445               | 0.72545              |
| 74 | HSD17B3  | rs1887774  | 0.15 | 0.80684                | 0.93447                | 0.41756               | 0.74496              | 0.31943               | 0.72545              |
| 75 | HSD17B3  | rs407179   | 0.25 | 0.79428                | 0.93447                | 0.32659               | 0.74496              | 0.63797               | 0.72545              |
| 76 | HSD17B3  | rs408876   | 0.14 | 0.46459                | 0.86428                | 0.63013               | 0.74496              | 0.71167               | 0.72545              |
| 77 | HSD17B3  | rs2026001  | 0.38 | 0.00801                | 0.24853                | 0.11586               | 0.70802              | 0.33863               | 0.72545              |
| 78 | HSD17B3  | rs8190512  | 0.46 | 0.05346                | 0.37909                | 0.73046               | 0.74496              | 0.40990               | 0.72545              |
| 79 | HSD17B3  | rs9409407  | 0.10 | 0.60833                | 0.93142                | 0.00595               | 0.13362              | 0.92187               | 0.76042              |
| 80 | HSD17B4  | rs10463469 | 0.13 | 0.96233                | 0.93447                | 0.70496               | 0.74496              | 0.29952               | 0.72545              |
| 81 | HSD17B4  | rs32662    | 0.46 | 0.52870                | 0.87238                | 0.00569               | 0.13362              | 0.60883               | 0.72545              |
| 82 | HSD17B4  | rs2560718  | 0.08 | 0.40562                | 0.84080                | 0.92452               | 0.75331              | 0.59685               | 0.72545              |
| 83 | HSD17B4  | rs32646    | 0.41 | 0.50764                | 0.86580                | 0.50380               | 0.74496              | 0.39279               | 0.72545              |
| 84 | HSD17B4  | rs2455463  | 0.44 | 0.40211                | 0.84080                | 0.05501               | 0.46825              | 0.54846               | 0.72545              |
| 85 | HSD17B7  | rs2186018  | 0.09 | 0.75822                | 0.93447                | 0.73028               | 0.74496              | 0.99713               | 0.78097              |
| 86 | HSD17B7  | rs1892125  | 0.08 | 0.31247                | 0.83602                | 0.82104               | 0.74496              | 0.13380               | 0.67063              |
| 87 | HSD17B7  | rs2805053  | 0.48 | 0.84458                | 0.93447                | 0.69996               | 0.74496              | 0.65565               | 0.72545              |
| 88 | HSD17B7  | rs7522935  | 0.05 | 0.49076                | 0.86428                | 0.02777               | 0.42449              | 0.36017               | 0.72545              |
| 89 | HSD17B7  | rs12026860 | 0.25 | 0.35999                | 0.84080                | 0.55958               | 0.74496              | 0.76769               | 0.72545              |
| 90 | HSD17B7  | rs11589262 | 0.35 | 0.03215                | 0.33326                | 0.86688               | 0.74496              | 0.86061               | 0.75530              |
| 91 | HSD3B1   | rs6686779  | 0.38 | 0.80675                | 0.93447                | 0.15122               | 0.72322              | 0.48845               | 0.72545              |
| 92 | HSD3B1   | rs3765945  | 0.38 | 0.97574                | 0.93447                | 0.64170               | 0.74496              | 0.28086               | 0.72545              |
| 93 | HSD3B1   | rs10754400 | 0.38 | 0.82193                | 0.93447                | 0.87454               | 0.74496              | 0.48674               | 0.72545              |
| 94 | HSD3B1   | rs6203     | 0.39 | 0.33752                | 0.84080                | 0.32633               | 0.74496              | 0.04518               | 0.54156              |
| 95 | HSD3B1   | rs10802107 | 0.23 | 0.05246                | 0.37909                | 0.24441               | 0.74496              | 0.61535               | 0.72545              |
| 96 | HSD3B1   | rs1856888  | 0.38 | 0.89704                | 0.93447                | 0.76378               | 0.74496              | 0.21546               | 0.72545              |

|     | Gene    | Rs No.     | MAF  | RISK<br><i>P</i> Chisq | RISK<br><i>Q</i> value | TT<br><i>P</i> Wilcox | TT<br><i>Q</i> value | TE<br><i>P</i> Wilcox | TE<br><i>Q</i> value |
|-----|---------|------------|------|------------------------|------------------------|-----------------------|----------------------|-----------------------|----------------------|
| 97  | HSD3B1  | rs1361530  | 0.10 | 0.84354                | 0.93447                | 0.58539               | 0.74496              | 0.96294               | 0.77890              |
| 98  | HSD3B2  | rs6658331  | 0.38 | 0.11271                | 0.58678                | 0.56449               | 0.74496              | 0.65868               | 0.72545              |
| 99  | HSD3B2  | rs1341018  | 0.38 | 0.16013                | 0.69718                | 0.51953               | 0.74496              | 0.51478               | 0.72545              |
| 100 | HSD3B2  | rs10923819 | 0.31 | 0.06139                | 0.41355                | 0.04065               | 0.44718              | 0.86995               | 0.75530              |
| 101 | SRD5A1  | rs2303705  | 0.42 | 0.73087                | 0.93447                | 0.47880               | 0.74496              | 0.43771               | 0.72545              |
| 102 | SRD5A1  | rs518673   | 0.32 | 0.57438                | 0.89988                | 0.49129               | 0.74496              | 0.84419               | 0.75530              |
| 103 | SRD5A1  | rs1651074  | 0.12 | 0.39362                | 0.84080                | 0.14902               | 0.72322              | 0.50508               | 0.72545              |
| 104 | SRD5A1  | rs1651071  | 0.47 | 0.04656                | 0.37909                | 0.10452               | 0.67631              | 0.18587               | 0.72545              |
| 105 | SRD5A1  | rs4702379  | 0.21 | 0.24317                | 0.78010                | 0.07377               | 0.57568              | 0.10666               | 0.66366              |
| 106 | SRD5A1  | rs11744535 | 0.26 | 0.37957                | 0.84080                | 0.34070               | 0.74496              | 0.53395               | 0.72545              |
| 107 | SRD5A2  | rs2365778  | 0.33 | 0.91535                | 0.93447                | 0.44689               | 0.74496              | 0.12687               | 0.67063              |
| 108 | SRD5A2  | rs11892064 | 0.07 | 0.36218                | 0.84080                | 0.21042               | 0.74496              | 0.85541               | 0.75530              |
| 109 | SRD5A2  | rs2208532  | 0.34 | 0.97659                | 0.93447                | 0.70340               | 0.74496              | 0.13835               | 0.67063              |
| 110 | SRD5A2  | rs632148   | 0.22 | 0.17233                | 0.70360                | 0.14620               | 0.72322              | 0.33021               | 0.72545              |
| 111 | SRD5A2  | rs4952224  | 0.06 | 0.60766                | 0.93142                | 0.17160               | 0.73916              | 0.78635               | 0.72786              |
| 112 | STS     | rs5934671  | 0.33 | 0.02636                | 0.32293                | 0.39144               | 0.74496              | 0.39381               | 0.72545              |
| 113 | STS     | rs4403552  | 0.30 | 0.19808                | 0.75352                | 0.56026               | 0.74496              | 0.32672               | 0.72545              |
| 114 | STS     | rs4830732  | 0.22 | 0.88506                | 0.93447                | 0.61085               | 0.74496              | 0.08166               | 0.64185              |
| 115 | SULT1A1 | rs12445705 | 0.12 | 0.80048                | 0.93447                | 0.84951               | 0.74496              | 0.28745               | 0.72545              |
| 116 | SULT1A1 | rs1968752  | 0.33 | 0.15511                | 0.69718                | 0.73775               | 0.74496              | 0.88170               | 0.75576              |
| 117 | SULT1E1 | rs1529039  | 0.17 | 0.50034                | 0.86428                | 0.97223               | 0.75450              | 0.68476               | 0.72545              |
| 118 | SULT1E1 | rs3775775  | 0.08 | 0.39044                | 0.84080                | 0.60790               | 0.74496              | 0.57346               | 0.72545              |
| 119 | SULT1E1 | rs3775770  | 0.28 | 0.64297                | 0.93447                | 0.97004               | 0.75450              | 0.64039               | 0.72545              |
| 120 | SULT1E1 | rs1590128  | 0.29 | 0.10658                | 0.58678                | 0.14523               | 0.72322              | 0.14969               | 0.67063              |
| 121 | SULT1E1 | rs1220703  | 0.43 | 0.73252                | 0.93447                | 0.46366               | 0.74496              | 0.90347               | 0.76042              |
| 122 | SULT1E1 | rs13112570 | 0.36 | 0.81178                | 0.93447                | 0.73560               | 0.74496              | 0.05515               | 0.54156              |
| 123 | SULT2A1 | rs188440   | 0.27 | 0.53093                | 0.87238                | 0.88340               | 0.74496              | 0.98058               | 0.77890              |
| 124 | SULT2A1 | rs182421   | 0.14 | 0.31490                | 0.83602                | 0.71351               | 0.74496              | 0.58987               | 0.72545              |
| 125 | SULT2A1 | rs2547238  | 0.32 | 0.02735                | 0.32293                | 0.67167               | 0.74496              | 0.61130               | 0.72545              |
| 126 | SULT2A1 | rs2910397  | 0.28 | 0.22163                | 0.75352                | 0.76821               | 0.74496              | 0.97638               | 0.77890              |
| 127 | UGT2B15 | rs4148269  | 0.34 | 0.68874                | 0.93447                | 0.77666               | 0.74496              | 0.01385               | 0.54156              |
| 128 | UGT2B15 | rs2045100  | 0.23 | 0.00734                | 0.24853                | 0.25937               | 0.74496              | 0.92336               | 0.76042              |

|            | <b>Gene</b> | <b>Rs No.</b> | <b>MAF</b> | <b>RISK<br/><i>P</i> Chisq</b> | <b>RISK<br/><i>Q</i> value</b> | <b>TT<br/><i>P</i> Wilcox</b> | <b>TT<br/><i>Q</i> value</b> | <b>TE<br/><i>P</i> Wilcox</b> | <b>TE<br/><i>Q</i> value</b> |
|------------|-------------|---------------|------------|--------------------------------|--------------------------------|-------------------------------|------------------------------|-------------------------------|------------------------------|
| <b>129</b> | UGT2B15     | rs1902023     | 0.42       | 0.01724                        | 0.32293                        | 0.97399                       | 0.75450                      | 0.41670                       | 0.72545                      |
| <b>130</b> | UGT2B17     | rs4860298     | 0.08       | 0.33674                        | 0.84080                        | 0.20019                       | 0.74496                      | 0.30200                       | 0.72545                      |
| <b>131</b> | UGT2B17     | rs7671342     | 0.19       | 0.32079                        | 0.83602                        | 0.69398                       | 0.74496                      | 0.88397                       | 0.75576                      |
| <b>132</b> | UGT2B17     | rs4860305     | 0.15       | 0.22527                        | 0.75352                        | 0.81732                       | 0.74496                      | 0.44126                       | 0.72545                      |
| <b>133</b> | UGT2B17     | rs7435827     | 0.48       | 0.84032                        | 0.93447                        | 0.73577                       | 0.74496                      | 0.74917                       | 0.72545                      |
| <b>134</b> | UGT2B28     | rs7657406     | 0.49       | 0.69616                        | 0.93447                        | 0.52238                       | 0.74496                      | 0.08596                       | 0.64185                      |
| <b>135</b> | UGT2B28     | rs10002503    | 0.14       | 0.36978                        | 0.84080                        | 0.48017                       | 0.74496                      | 0.51473                       | 0.72545                      |
| <b>136</b> | UGT2B4      | rs2736520     | 0.15       | 0.68331                        | 0.93447                        | 0.58667                       | 0.74496                      | 0.04950                       | 0.54156                      |
| <b>137</b> | UGT2B4      | rs903446      | 0.39       | 0.80987                        | 0.93447                        | 0.85372                       | 0.74496                      | 0.14619                       | 0.67063                      |
| <b>138</b> | UGT2B4      | rs1389930     | 0.08       | 0.27518                        | 0.83602                        | 0.57153                       | 0.74496                      | 0.60250                       | 0.72545                      |
| <b>139</b> | UGT2B4      | rs1121124     | 0.40       | 0.92518                        | 0.93447                        | 0.51672                       | 0.74496                      | 0.37778                       | 0.72545                      |
| <b>140</b> | UGT2B4      | rs2013562     | 0.48       | 0.73583                        | 0.93447                        | 0.59699                       | 0.74496                      | 0.29726                       | 0.72545                      |
| <b>141</b> | UGT2B7      | rs4587017     | 0.48       | 0.89598                        | 0.93447                        | 0.69484                       | 0.74496                      | 0.74489                       | 0.72545                      |
| <b>142</b> | UGT2B7      | rs7662029     | 0.50       | 0.85298                        | 0.93447                        | 0.67669                       | 0.74496                      | 0.51988                       | 0.72545                      |
| <b>143</b> | UGT2B7      | rs12513195    | 0.48       | 0.93371                        | 0.93447                        | 0.81639                       | 0.74496                      | 0.54606                       | 0.72545                      |
